# Supplementary material for: Scalable, superelastic, and superhydrophobic MXene/silver nanowire/melamine hybrid sponges for high-performance electromagnetic interference shielding
Source: Royal Society of Chemistry journal article supplement (doi:10.1039/d2tc00516f), 2022-01-01
Supplement: d2tc00516f4.pdf [file d2tc00516f4.pdf]

## Supporting Information

# Scalable, superelastic, and superhydrophobic MXene/silver nanowire/melamine hybrid sponges for high-performance electromagnetic interference shielding

Shijun Wang<sup>a,b</sup>, Diansen Li<sup>a,c,\*</sup>, Weijia Meng<sup>a</sup>, Lei Jiang<sup>a</sup>, Daining Fang<sup>d</sup>

<sup>a</sup> Key Laboratory of Bio-Inspired Smart Interfacial Science and Technology, Ministry of Education, School of Chemistry, Beihang University, Beijing 100191, China

<sup>b</sup> Institute of Engineering Thermophysics, Chinese Academy of Sciences, Beijing 100190, China

<sup>c</sup> Beijing Advanced Innovation Center for Biomedical Engineering, Beihang University, Beijing 100191, China

<sup>d</sup> State Key Laboratory for Turbulence & Complex Systems, College of Engineering, Peking University, Beijing, 100871, China

\* Corresponding author: E-mail: [lidiansen@buaa.edu.cn](mailto:lidiansen@buaa.edu.cn)

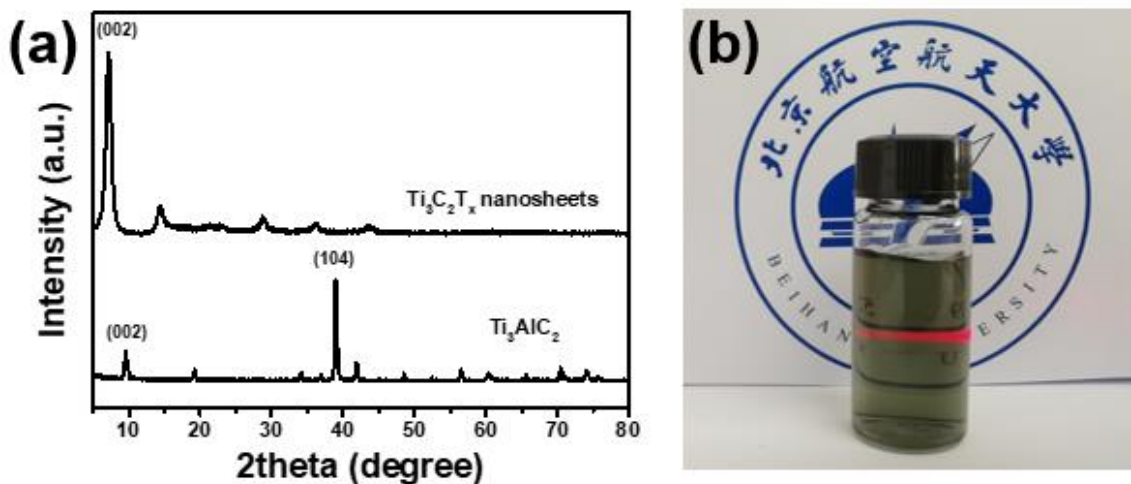

**Fig. S1.** (a) XRD patterns of  $\text{Ti}_3\text{AlC}_2$  and  $\text{Ti}_3\text{C}_2\text{T}_x$  nanosheets; (b) Tyndall scattering effect of MXene nanosheet dispersion.

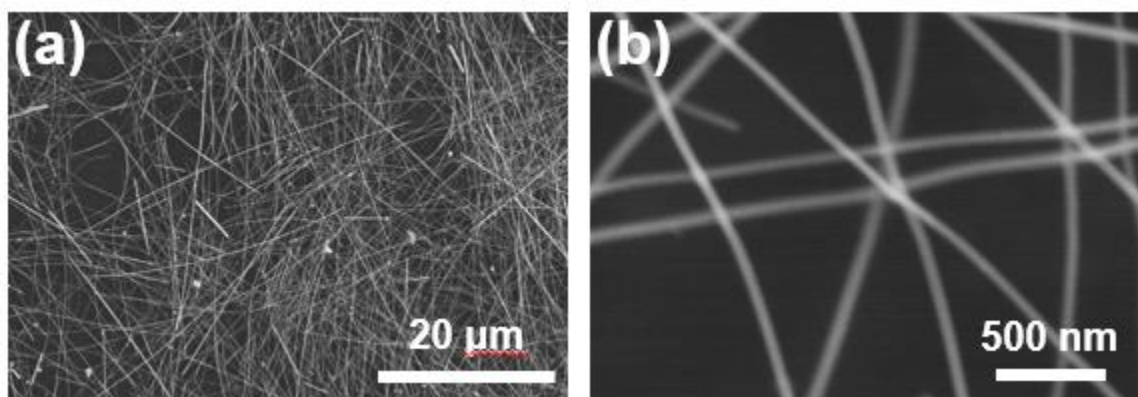

**Fig. S2.** (a,b) SEM images of AgNWs.

**Table S1.** The porosity and specific surface area of the hybrid sponges.

|                                                      | MS    | MS-M  | MS-MA | MS-MAF |
|------------------------------------------------------|-------|-------|-------|--------|
| Porosity (%)                                         | 99.4  | 99.3  | 99.2  | 99.2   |
| Specific surface area ( $\text{m}^2 \text{g}^{-1}$ ) | 220.7 | 292.3 | 298.1 | 298.6  |

**Table S2.** Comparison of the EMI shielding performance of the MS-MAF hybrid sponge with reported porous EMI shielding materials.

| <b>Materials</b>                                           | <b>Thickness (mm)</b> | <b>Density (g cm<sup>-3</sup>)</b> | <b>SSE/t (dB cm<sup>2</sup> g<sup>-1</sup>)</b> | <b>Refs</b>      |
|------------------------------------------------------------|-----------------------|------------------------------------|-------------------------------------------------|------------------|
| Graphene-PMMA foam                                         | 2.4                   | 0.76                               | 104                                             | 1                |
| CNT-PS foam                                                | 1.2                   | 0.604                              | 276                                             | 2                |
| PEI/graphene/Fe <sub>3</sub> O <sub>4</sub> foam           | 2.5                   | 0.439                              | 166                                             | 3                |
| PEI/graphene foam                                          | 2.3                   | 0.29                               | 192                                             | 4                |
| PP-SSF composite foam                                      | 3.1                   | 0.64                               | 242                                             | 5                |
| C/SiO <sub>2</sub> /SiC aerogel                            | 6                     | 0.2                                | 200                                             | 6                |
| Ag/CNTs/SBS foam                                           | 4                     | 0.42                               | 542                                             | 7                |
| CNT/cellulose aerogel                                      | 2.5                   | 0.095                              | 876                                             | 8                |
| CuNi-CNT foam                                              | 1.5                   | 0.23                               | 1583                                            | 9                |
| Graphene aerogel-CT                                        | 3                     | 0.07                               | 1760                                            | 10               |
| Carbon foam                                                | 2                     | 0.166                              | 1250                                            | 11               |
| Graphene/PDMS foam                                         | 1                     | 0.06                               | 3330                                            | 12               |
| BS-graphene foam                                           | 1                     | 0.18                               | 3110                                            | 13               |
| V <sub>2</sub> O <sub>5</sub> -PANI aerogel                | 6                     | 0.021                              | 2770                                            | 14               |
| MXene aerogel/WPC                                          | 3                     | 0.197                              | 1206                                            | 15               |
| PN-based carbon foam                                       | 2                     | 0.15                               | 1705                                            | 16               |
| CNF/AgNW sponge                                            | 3                     | 0.035                              | 2674                                            | 17               |
| PI/graphene aerogel                                        | 2.5                   | 0.076                              | 1516                                            | 18               |
| CNT-sponge                                                 | 2.38                  | 0.02                               | 4622                                            | 19               |
| GO/cellulose aerogel                                       | 2                     | 0.057                              | 5132                                            | 20               |
| MWCNT/WPU foam                                             | 1                     | 0.039                              | 5410                                            | 21               |
| CNF@Co/C aerogel                                           | 4                     | 0.023                              | 6095                                            | 22               |
| CNF/AgNW@Fe <sub>3</sub> O <sub>4</sub> sponge             | 3                     | 0.016                              | 6751                                            | 23               |
| CMF/rGO/Ag hybrid foam                                     | 5                     | 0.016                              | 7616                                            | 24               |
| Ti <sub>2</sub> CT <sub>x</sub> /PVA foam                  | 5                     | 0.011                              | 5136                                            | 25               |
| Ti <sub>3</sub> C <sub>2</sub> T <sub>x</sub> /CNT aerogel | 3                     | 0.042                              | 8246                                            | 26               |
| <b>MS-MAF hybrid sponge</b>                                | <b>2</b>              | <b>0.012</b>                       | <b>10128</b>                                    | <b>This work</b> |

## References

1. H. B. Zhang, Q. Yan, W. G. Zheng, Z. He and Z. Z. Yu, *ACS Appl. Mater. Interfaces*, 2011, **3**, 918-924.
2. Y. L. Yang and M. C. Gupta, *Nano Lett.*, 2005, **5**, 2131-2134.
3. B. Shen, W. Zhai, M. Tao, J. Ling and W. Zheng, *ACS Appl. Mater. Interfaces*, 2013, **5**, 11383-11391.
4. J. Ling, W. Zhai, W. Feng, B. Shen, J. Zhang and W. Zheng, *ACS Appl. Mater. Interfaces*, 2013, **5**, 2677-2684.
5. A. Ameli, M. Nofar, S. Wang and C. B. Park, *ACS Appl. Mater. Interfaces*, 2014, **6**, 11091-11100.
6. Z. An, C. Ye, R. Zhang and Q. Qu, *J. Sol-Gel Sci. Technol.*, 2019, **89**, 623-633.
7. D. Tian, Y. Xu, Y. Wang, Z. Lei, Z. Lin, T. Zhao, Y. Hu, R. Sun and C.-P. Wong, *Chem. Eng. J.*, 2021, **420**, 130482.
8. H. D. Huang, C. Y. Liu, D. Zhou, X. Jiang, G. J. Zhong, D. X. Yan and Z. M. Li, *J. Mater. Chem. A*, 2015, **3**, 4983-4991.
9. K. Ji, H. Zhao, J. Zhang, J. Chen and Z. Dai, *Appl. Surf. Sci.*, 2014, **311**, 351-356.
10. W. L. Song, X. T. Guan, L. Z. Fan, W. Q. Cao, C. Y. Wang and M. S. Cao, *Carbon*, 2015, **93**, 151-160.
11. F. Moglie, D. Micheli, S. Laurenzi, M. Marchetti and V. Mariani Primiani, *Carbon*, 2012, **50**, 1972-1980.
12. Z. Chen, C. Xu, C. Ma, W. Ren and H. M. Cheng, *Adv. Mater.*, 2013, **25**, 1296-1300.
13. C. Xing, S. Zhu, Z. Ullah, X. Pan, F. Wu, X. Zuo, J. Liu, M. Chen, W. Li, Q. Li and L. Liu, *Appl. Surf. Sci.*, 2019, **491**, 616-623.

14. A. Puthiyedath Narayanan, K. N. Narayanan Unni and K. Peethambharan Surendran, *Chem. Eng. J.*, 2021, **408**, 127239.
15. C. Liang, H. Qiu, P. Song, X. Shi, J. Kong and J. Gu, *Sci. Bull.*, 2020, **65**, 616-622.
16. L. Zhang, M. Liu, S. Roy, E. K. Chu, K. Y. See and X. Hu, *ACS Appl. Mater. Interfaces*, 2016, **8**, 7422-7430.
17. Y. Chen, L. Zhang, C. Mei, Y. Li, G. Duan, S. Agarwal, A. Greiner, C. Ma and S. Jiang, *ACS Appl. Mater. Interfaces*, 2020, **12**, 35513-35522.
18. Z. Yu, T. Dai, S. Yuan, H. Zou and P. Liu, *ACS Appl. Mater. Interfaces*, 2020, **12**, 30990-31001.
19. M. Crespo, M. González, A. L. Elías, L. Pulickal Rajukumar, J. Baselga, M. Terrones and J. Pozuelo, *Phys. Status Solidi RRL*, 2014, **8**, 698-704.
20. C. Wan and J. Li, *Carbohydr. Polym.*, 2016, **150**, 172-179.
21. Z. Zeng, H. Jin, M. Chen, W. Li, L. Zhou and Z. Zhang, *Adv. Funct. Mater.*, 2016, **26**, 303-310.
22. Y. Fei, M. Liang, T. Zhou, Y. Chen and H. Zou, *Carbon*, 2020, **167**, 575-584.
23. Y. Chen, H. Luo, H. Guo, K. Liu, C. Mei, Y. Li, G. Duan, S. He, J. Han, J. Zheng, S. E and S. Jiang, *Carbohydr. Polym.*, 2022, **276**, 118799.
24. Y. Shen, Z. Lin, J. Wei, Y. Xu, Y. Wan, T. Zhao, X. Zeng, Y. Hu and R. Sun, *Carbon*, 2022, **186**, 9-18.
25. H. Xu, X. Yin, X. Li, M. Li, S. Liang, L. Zhang and L. Cheng, *ACS Appl. Mater. Interfaces*, 2019, **11**, 10198-10207.
26. P. Sambyal, A. Iqbal, J. Hong, H. Kim, M. K. Kim, S. M. Hong, M. Han, Y. Gogotsi and C. M. Koo, *ACS Appl. Mater. Interfaces*, 2019, **11**, 38046-38054.
